# Supplementary material
Source: PubMed Central journal article supplement (PMC1994420)
Supplement: heart_hrt.2006.102244_1.pdf [file heart_hrt.2006.102244_1.pdf]

**SUPPLEMENTAL ONLINE FIGURE 1**

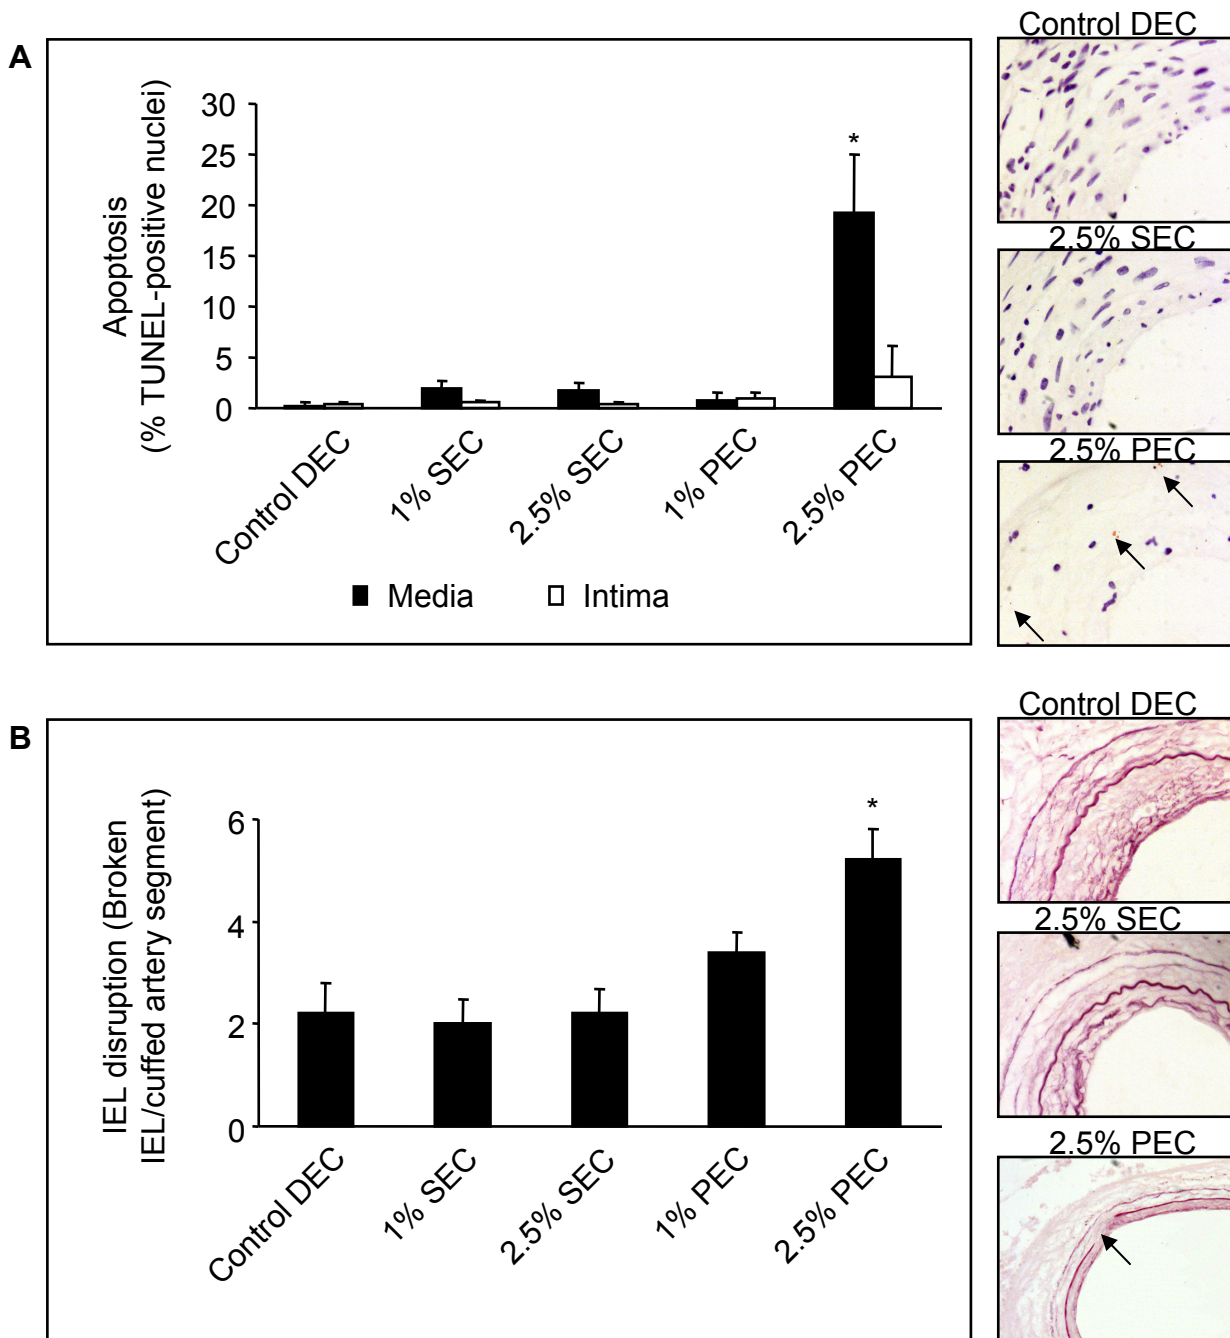

**Supplemental online Figure 1. A:** Percentage of TUNEL-positive nuclei of cuffed segments treated with increasing concentrations of sirolimus or paclitaxel 14 days after drug-eluting cuff (DEC) placement. TUNEL-positive nuclei were counted in six equally spaced cross sections from each cuffed artery and expressed as a percentage of the total number of medial (close bars) and intimal (open bars) nuclei. Insert: TUNEL staining; arteries locally treated with a 2.5% paclitaxel-eluting cuff (PEC) show an increase in medial TUNEL-positive nuclei as compared to control DEC- and sirolimus-eluting cuff (SEC) treated segments. Arrows indicate TUNEL-positive nuclei, magnification 400x. **B:** Percentage of internal elastic lamina (IEL) disruption of cuffed segments treated with increasing concentrations of sirolimus or paclitaxel 14 days after DEC placement. IEL disruption was assessed in ten serial cross-sections from each cuffed segment and expressed as the number of broken IEL per cuffed artery segment. Insert: Weigert's elastin staining; Arrow indicates IEL disruption, magnification 400x. Mean±SEM, n=8. \*p<0.05 v all other groups.
