# Supplementary material
Source: PubMed Central journal article supplement (PMC1994420)
Supplement: heart_hrt.2006.102244_2.pdf [file heart_hrt.2006.102244_2.pdf]

**SUPPLEMENTAL ONLINE FIGURE 2**

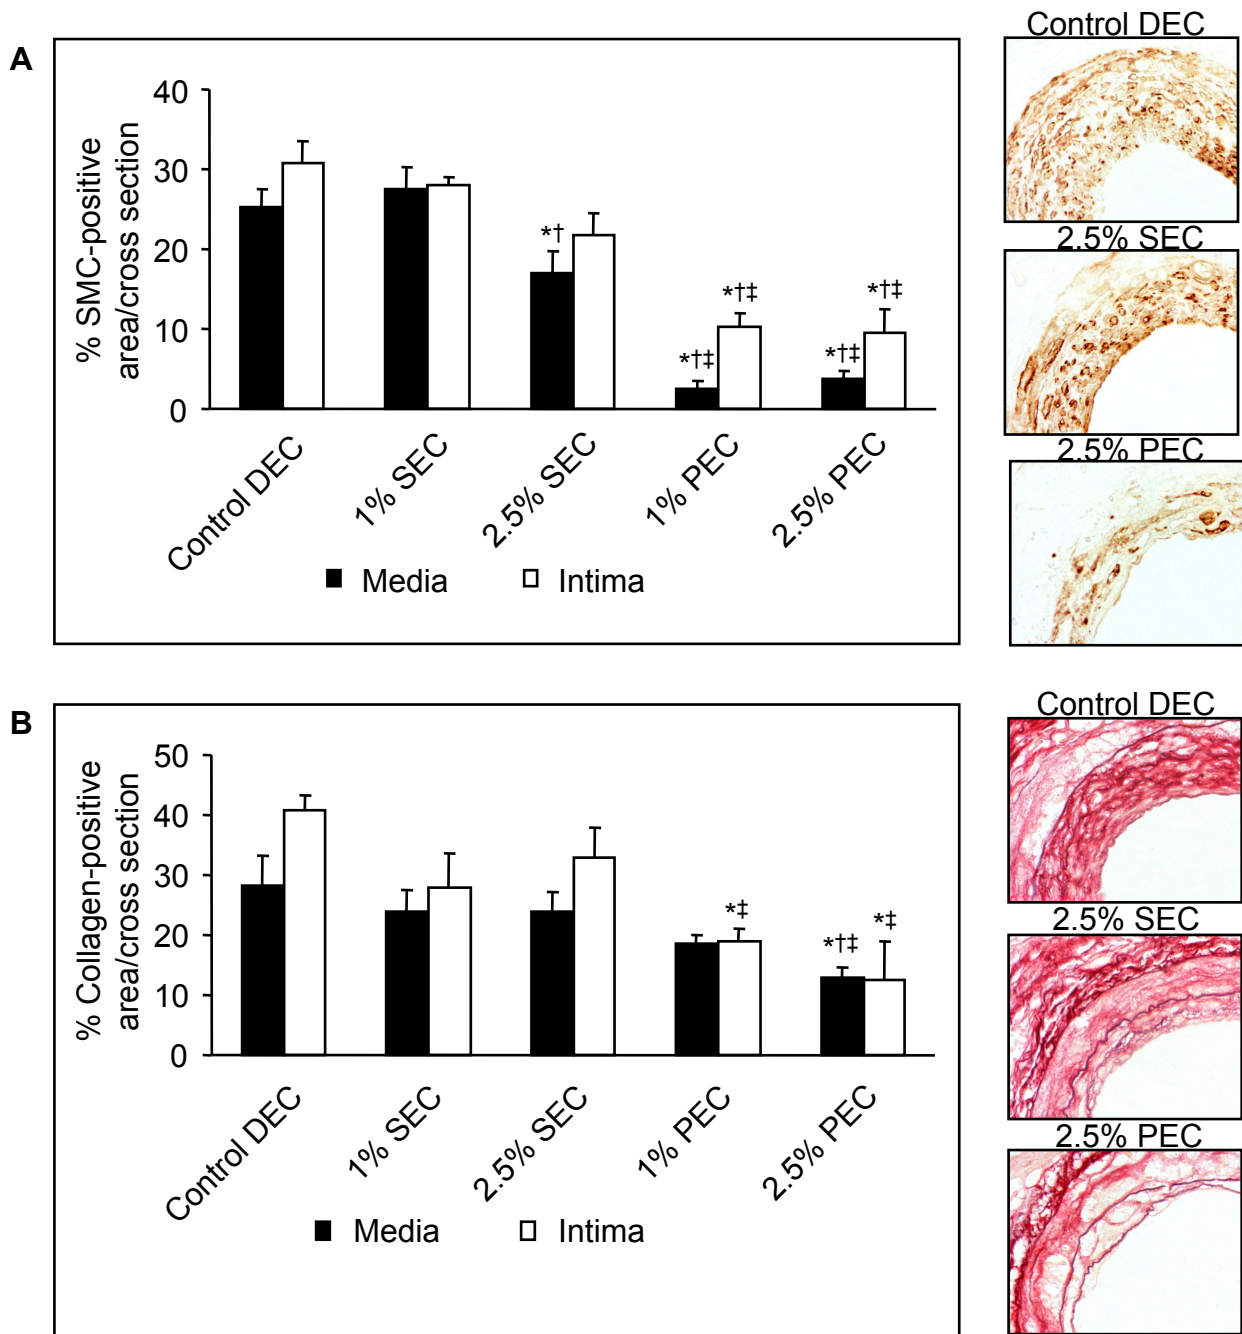

**Supplemental online Figure 2. A:** Percentage of medial (close bars) and intimal (open bars)  $\alpha$ -Smooth Muscle (SM) actin-positive area of cuffed femoral arteries treated with increasing concentrations of sirolimus or paclitaxel 14 days after drug-eluting cuff (DEC) placement. SMC-positive area was quantified by image analysis using six sections in each cuffed artery and expressed in percentage of medial or intimal area. Insert:  $\alpha$ -SM actin staining; arteries locally treated with a 1% and 2.5% paclitaxel-eluting cuff (PEC) show a strong decrease both in medial and intimal SMC-positive area (magnification 400x). **B:** Percentage of Sirius red-positive area as quantified by image analysis using six sections in each cuffed artery and expressed in percentage of medial or intimal Sirius red-positive area. Insert: Sirius red stain; Paclitaxel perivascular treatment leads to a strong decrease in both medial and intimal collagen-positive area (magnification 400x). Mean $\pm$ SEM, n=8. \*p<0.05 v Control DEC; †p<0.05 v 1% SEC; ‡p<0.05 v 2.5% SEC. SEC=sirolimus-eluting cuff.
