# Supplementary material
Source: PubMed Central journal article supplement (PMC1994420)
Supplement: heart_hrt.2006.102244_3.pdf [file heart_hrt.2006.102244_3.pdf]

### SUPPLEMENTAL ONLINE FIGURE 3

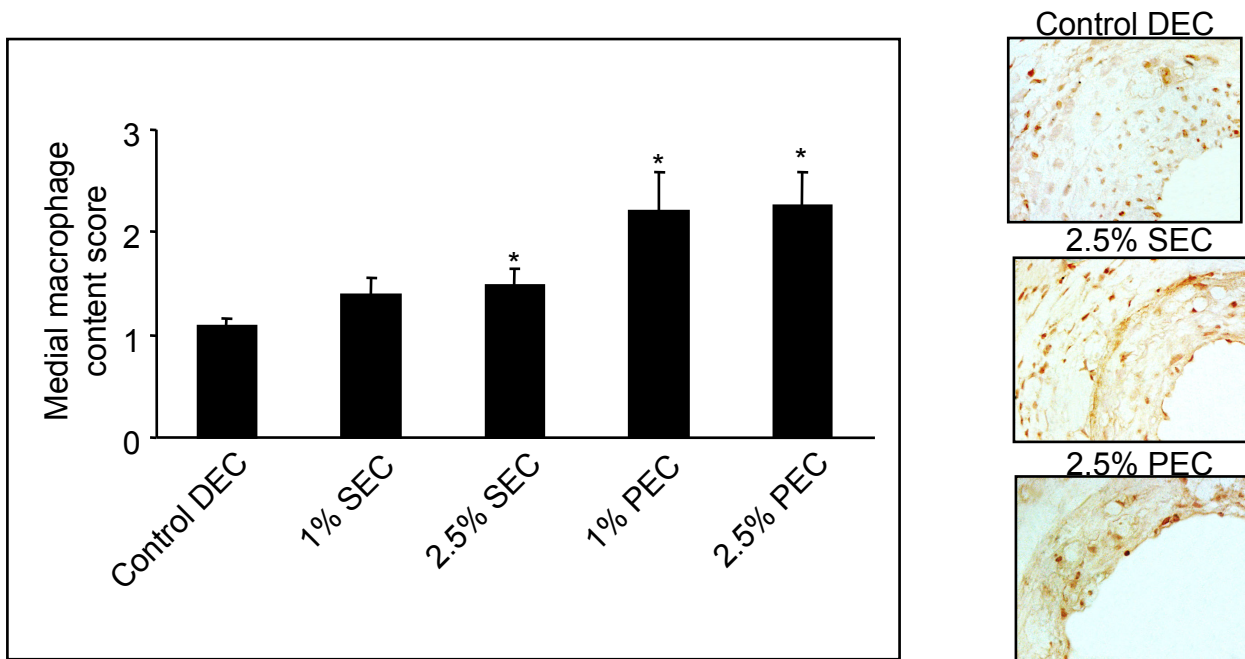

**Supplemental online Figure 3.** Quantification score of the number of medial macrophages per microscopic field of cuffed femoral artery segments from 14-day control drug- (DEC), sirolimus- (SEC), and paclitaxel-eluting cuff (PEC). Scoring was as follows: 1= 0-10 positive cells/field, 2= 10-20 positive cells/field, 3= >20 positive cells/field. Ten fields per section were analyzed in all mice (magnification 100x). Mean±SEM, n=8. \*p<0.05 v control DEC. Insert: Mac3 immunostaining for tissue macrophage; magnification 400x.
